# Supplementary material
Source: Springer Nature journal article supplement (https://www.springermedizin.de/resource/supplementary/12889_2013_6606_MOESM2_ESM.pdf/9498646)

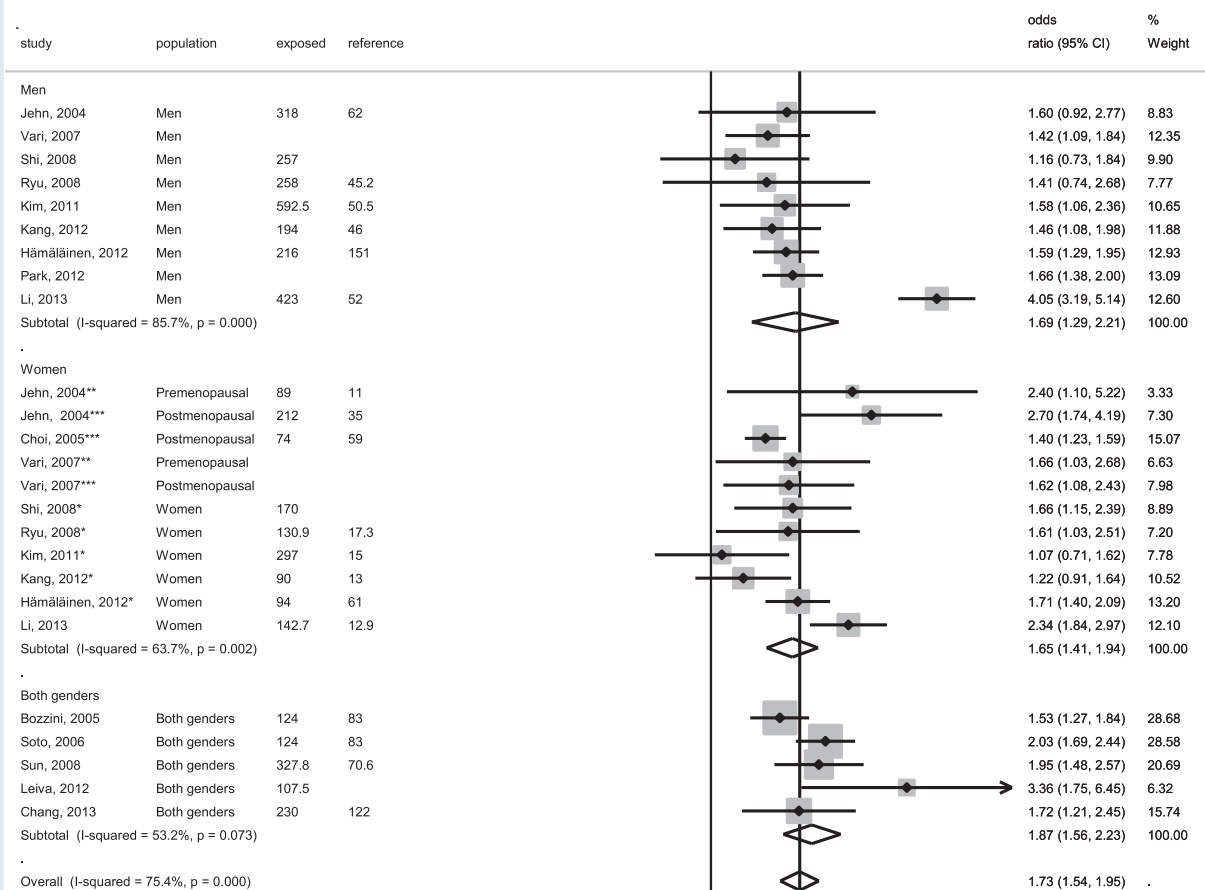

NOTE: Weights are from random effects analysis

Supplement: MOESM2 [file 9498646]
